# Supplementary material
Source: Elsevier journal article supplement (https://www.sciencedirect.com/science/article/pii/S2666506923000056)
Supplement: mmc1 [file S2666506923000056:mmc1.docx]

**IN MEMORIAM (Versió catalana)**

**Dr. Jesús Galilea Muñoz (1926-2022)**

En les mateixes dates que a *Apunts Sports Medicine* se li comunicava que a partit de juny de 2023 obtindria factor d’impacte (JCR), ens deixava el Dr. Jesús Galilea Muñoz (1926-2022), que fou l’ànima de la revista des de la seva fundació allà al 1964 fins a l’actualitat.

El Dr. Jesús Galilea Muñoz va néixer a Granada el 8 d’octubre del 1926. El seu pare era farmacèutic militar i això l’obligà a anar canviant de ciutat durant tota la seva infantesa. Potser per això casa seva no era el lloc on vivia, sinó la família i els amics que tenia. Després dels seus estudis de batxillerat a Salamanca, als 17 anys, la família canvia la seva residència a Barcelona on comença la seva formació com a metge a la Facultat de Medicina al Hospital Clínic. Des de llavors, els estudis de medicina inevitablement es barregen amb la seva dèria per l’esport, generant la llavor del que seria la seva passió professional: la medicina de l’esport.

El Dr. Galilea fou l’impulsor i líder indiscutible de la medicina de l’esport en el nostre país. Així ho reflexa la seva carrera professional: del 1962 al 1975 és el director del Centre de Medicina de l'Esport de la Residència Blume de Barcelona. No només n’és el director, sinó l’ideòleg d’una especialitat jove i atrevida. Allà aglutina una generació de metges que impulsen de manera definitiva la medicina de l’esport al nostre país. El 1975 es fa càrrec del recentment inaugurat [Institut Nacional d'Educació Física de Catalunya](https://ca.wikipedia.org/wiki/Institut_Nacional_d%27Educaci%C3%B3_F%C3%ADsica_de_Catalunya), del qual és membre de la junta rectora entre 1981 i 1996. L’any 1987 l’encarreguen la tasca d’organitzar el Departament d'Investigació del jove [Centre d'Alt Rendiment de Sant Cugat del Vallès](https://ca.wikipedia.org/wiki/Centre_d%27Alt_Rendiment_de_Sant_Cugat_del_Vall%C3%A8s). Del 1986 al 1991 és cap de la Secció de Medicina de l'Esport de la [Direcció General de l'Esport de la Generalitat de Catalunya](https://ca.wikipedia.org/wiki/Secretaria_General_de_l%27Esport_de_la_Generalitat_de_Catalunya). Si ens n’adonem, ell és el primer que inaugura tots i cadascun dels serveis i institucions, bastint els fonaments de cadascun d’ells, donant-los forma i contingut i, el que és més important potser, transferint-los-hi el seu caràcter, mescla de serietat i passió.

Al 1964, juntament amb el Dr. [Josep Estruch Batlle](https://ca.wikipedia.org/wiki/Josep_Estruch_Batlle), funda la revista [***Apuntes del Centro Juvenil de Medicina Deportiva***, llavor de la que avui és ***Apunts Sports Medicine***](https://ca.wikipedia.org/w/index.php?title=Apunts._Medicina_de_l%27Esport&action=edit&redlink=1). El Dr. Galilea és el director de la revista del 1964 al 1999. S’envolta d’una sèrie de professionals admirables i aconsegueix que els més importants investigadors internacionals de l’especialitat -com per exemple Astrand (1978)1, Saltin et Al (1982)2 o Wasserman et Al (1991)3- publiquin a les seves pàgines. La cuida i la fa fer créixer amb una dedicació i un entusiasme extraordinari.

Ens consta que el Dr. Galilea -un cop retirat de la vida professional- seguia amb interès i alegria l’evolució de la revista i li agradava saber dels canvis que progressivament anàvem realitzant per adaptar-la a les noves tendències editorials. Hi ha, però, una cosa que la revista no canviarà mai i que humilment -els que ens considerem els seus hereus- mai en renunciarem i és a viure-la amb la serietat i entusiasme que ell ens contagiava.

Dr Ramon Balius

Dr Gil Rodas

**IN MEMORIAM**

**Dr. Jesús Galilea Muñoz (1926-2022) (Versión castellana)**

Por las mismas fechas que a ***Apunts Sports Medicine*** se le comunicaba que a partir de junio de 2023 obtendría factor de impacto (JCR), nos dejaba el Dr. Jesús Galilea Muñoz (1926-2022), alma de la revista desde su fundación en 1964 hasta la actualidad.

El Dr. Jesús Galilea Muñoz nació en Granada el 8 de octubre de 1926. Su padre era farmacéutico militar y esto le obligó a ir cambiando de ciudad durante toda su infancia. Quizá por eso su casa no era el lugar donde vivía, sino que lo eran su familia y sus amigos. A los 17 años, tras sus estudios de bachillerato en Salamanca, la familia cambia de residencia y se instala en Barcelona donde comienza su formación como médico en la Facultad de Medicina en el Hospital Clínic. Desde entonces, los estudios de medicina inevitablemente se mezclan con su pasión por el deporte, generando la semilla de lo que sería su vocación profesional: la medicina del deporte.

El Dr. Galilea ha sido el impulsor y líder indiscutible de la medicina del deporte en nuestro país. Así lo refleja su carrera profesional: de 1962 a 1975 fue el director del Centro de Medicina del Deporte de la Residencia Blume de Barcelona. No sólo fue su director, sino el ideólogo de una especialidad joven y atrevida. Allí aglutinó a una generación de médicos que impulsaron de forma definitiva la medicina del deporte en nuestro país. En 1975 se hizo cargo del recientemente inaugurado Instituto Nacional de Educación Física de Cataluña, del que fue miembro de la junta rectora entre 1981 y 1996. En 1987 le encargaron la tarea de organizar el Departamento de Investigación del joven Centro de Alto Rendimiento de Sant Cugat del Vallés. Entre 1986 y 1991 fue jefe de la Sección de Medicina del Deporte de la Direcció General de l’Esport de la Generalitat de Catalunya. Si nos damos cuenta, él es el primero que inaugura todos y cada uno de los servicios e instituciones, construyendo los fundamentos de cada uno de ellos, dándoles forma y contenido y, lo que es más importante tal vez, imprimiéndoles su carácter, mezcla de seriedad y pasión.

En 1964, junto con el Dr. Josep Estruch Batlle, funda la revista ***Apuntes del Centro Juvenil de Medicina Deportiva***, semilla de lo que es hoy ***Apunts Sports Medicine***. El Dr. Galilea fue el director de la revista de 1964 a 1999. Se rodeó de una serie de profesionales admirables y consiguió que los más importantes investigadores internacionales de la especialidad -como por ejemplo Astrand (1978)1, Saltin et Al (1982)2 o Wasserman et Al (1991)3- publicaran en sus páginas. La cuidó y la hizo crecer con una dedicación y un entusiasmo extraordinario.

Nos consta que el Dr. Galilea -una vez retirado de la vida profesional- seguía con interés y alegría la evolución de la revista y le gustaba conocer los cambios que progresivamente íbamos realizando para adaptarla a las nuevas tendencias editoriales. Sin embargo, hay algo de la revista que nunca cambiaremos y a lo que humildemente -los que nos consideramos sus herederos- nunca renunciaremos y que es vivirla con la seriedad y entusiasmo que él nos contagió.

Dr. Ramon Balius

Dr. Gil Rodas
